# Supplementary material for: An Equine Wound Model to Study Effects of Bacterial Aggregates on Wound Healing
Source: PubMed Central journal article supplement (PMC6709944; doi:10.1089/wound.2018.0901), 2019-08-21
Supplement: Supp_Fig1.pdf [file Supp_Fig1.pdf]

## Supplementary Data

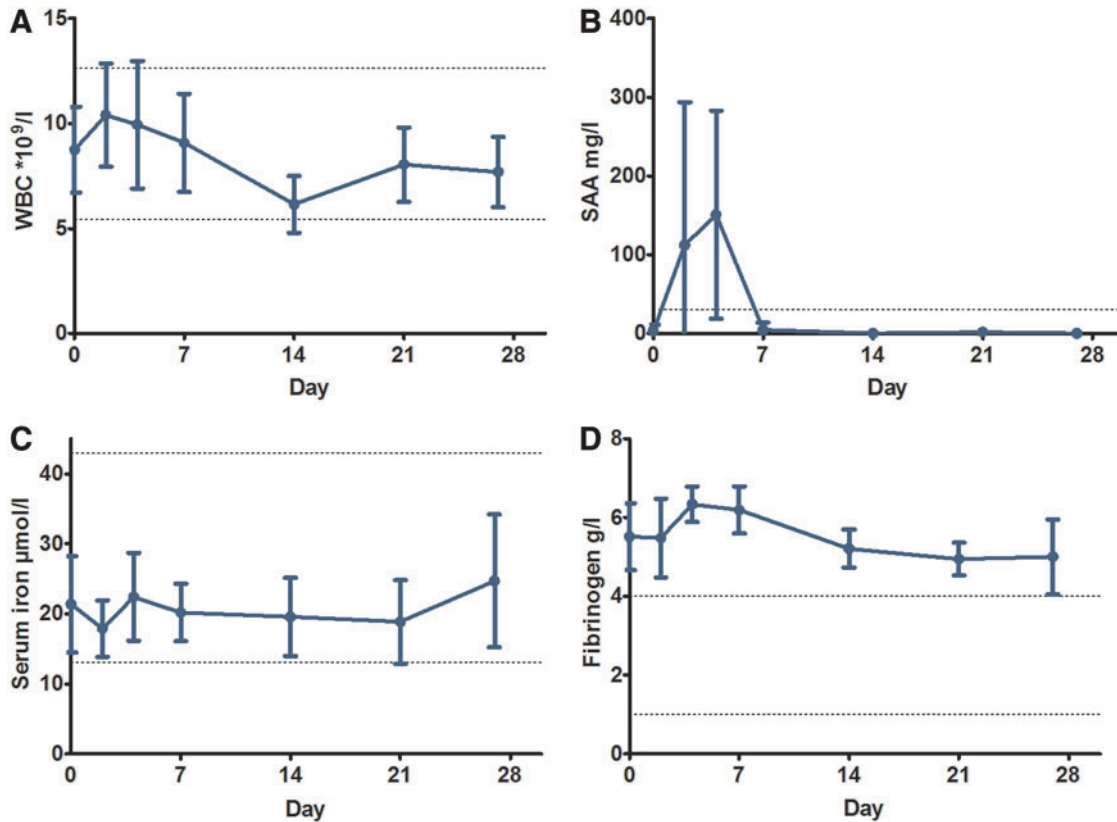

**Supplementary Figure S1.** WBC and biochemical markers for horses participating in an experimental excisional wound model with bacterial aggregate infection. **(A)** WBC stayed within reference levels ( $5.45\text{--}12.65 \times 10^9/L$ ) throughout the study period, but increased significantly from  $8.75 \times 10^9/L$  ( $6.23\text{--}11.27$ ) to  $10.40 \times 10^9/L$  ( $9.21\text{--}11.56$ ,  $p=0.0083$ ) on day 0 to 2 and decreased significantly to  $6.14 \times 10^9/L$  ( $4.29\text{--}7.99$ ,  $p=0.0078$ ) on day 14. **(B)** SAA concentrations were within reference level ( $0\text{--}30$  mg/L) on day 0 and increased significantly on day 2 (19 times,  $1.2\text{--}307$ ,  $p=0.037$ ) and 4 (133 times,  $6.6\text{--}2680$ ,  $p=0.0026$ ) to a peak (median) of  $129$  mg/L (range  $0.1\text{--}349$  mg/L) on day 4. **(C)** Serum iron concentrations stayed within reference values ( $13.1\text{--}43.0$   $\mu\text{M}$ ) with no significant changes over time ( $p=0.42$ ). **(D)** Fibrinogen concentrations in the blood on day 0 ( $5.52$  g/L;  $4.63\text{--}6.40$ ) were slightly above reference values ( $1.00\text{--}4.00$  g/L) and increased significantly on day 4 to  $6.34$  g/L ( $5.67\text{--}7.02$ ,  $p=0.019$ ). Data from five horses are included. Reference levels are indicated by dotted lines. SAA, serum amyloid A; WBC, white blood cell count.
